# Supplementary material for: Video Observation of Kindergarten Teachers’ Use of Questions in Picture-Book Reading with Quiet Multilingual Children: A Pilot Study
Source: MDPI journal article supplement (doi:10.3390/educsci13101066), 2023-10-23
Supplement: s1 [file s1]

Archive with 1 entries (1 files):
- education-2550272-supplementary.pdf
